# Supplementary material for: Monosodium glutamate (MSG) perturbs trophoblast differentiation and invasion program through a ROS-mediated pathway
Source: Research Square preprint supplement (doi:10.21203/rs.3.rs-1867105/v2), 2022-08-29
Supplement: Supplementary file 1 [file b4edd9b1cce4dddc2815f00b.docx]

**SUPPLEMENTARY DETAILS**

**Legends:**

Suppl. Fig 1. (A) BeWo and (B) HTR-8/SVneo cells were treated with 25 mM MSG and 50 mM MSG to check their acute effects on the trophoblast cells. The images were visualized under an inverted microscope at 100X magnification. The trophoblast cells were treated with 25 mM MSG alternatively for a stretch of 16 days and images of (C) BeWo and (D) HTR-8/SV neo cells were visualized under the microscope on days 4, 8, 12 and 16 at 100X magnification to check the effect of chronic stimulation of MSG. (E) Images of treated and untreated early placental explants stimulated with 50 mM MSG.

Suppl Fig 2. (A-D) Cell death was measured by flow cytometry using Annexin V-FITC and PI double staining. BeWo and HTR8/SVneo cells were exposed to the chosen concentrations of MSG. In each density plot quadrant Q1: shows necrotic cells (Annexin− PI+); Q2: late apoptotic cells (Annexin+ PI+); Q3: shows the viable cells (Annexin− PI−) and Q4: early apoptotic cells (Annexin+ PI−) (E-H) Cell cycle analysis was performed in the trophoblast cells using the chosen concentration of MSG for both acute and chronic stimulation. Results are representative of at least three independent experiments.

Suppl Fig 3. (A-D) Protein expression of NRF2 was also checked in the lysates of the trophoblast cells BeWo and HTR-8/SV neo treated with 50 mM MSG to check the chronic effect of MSG on NRF2. The data was normalized with respect to GAPDH. Band intensities were quantified using ImageJ and plotted graphically. All data obtained are shown as Mean ± Standard deviation. The results shown are representative of at least three independent experiments. * p < 0.05; ** p < 0.01; *** p < 0.001. **** p < 0.0001

Suppl Fig 4. (A-E) Original obtained after performing western blotting showing the protein levels of MMPs and their inhibitors after acute stimulation of MSG in HTR-8/SV neo cells. GAPDH served as the loading control.

Suppl Fig 5. Original gel obtained after performing gelatin zymography showing the levels of MMPs and their TIMPs after acute stimulation of MSG in the conditioned media of HTR-8/SV neo cells.

Suppl Fig 6. (A-E) Original blots obtained after performing western blotting the protein levels of MMPs and their inhibitors after chronic stimulation of MSG in HTR-8/SV neo cells.. GAPDH served as the loading control.

Suppl Fig 7. Original gel obtained after performing gelatin zymography showing the levels of MMPs and their TIMPs after chronic stimulation of MSG in the conditioned media of HTR-8/SV neo cells.

Suppl Fig 8. (A-F) Original blots obtained after performing western blotting showing the protein levels of BiP, IRE1α, XBP-1s in both HTR-8/SV neo and BeWo cells. GAPDH was taken as the loading control.

Suppl. Table 1. Details of primers used in this study.
